# Supplementary material for: Multiparameter Microwave Characterization and Probing of Ultralow Glucose Concentration Using a Microfabricated Biochip
Source: MDPI journal article supplement (doi:10.3390/mi7060093), 2016-05-24
Supplement: s1 [file s1]

# Supplementary Materials: Multiparameter Microwave Characterization and Probing of Ultralow Glucose Concentration Using Microfabricated Biochip

Kishor Kumar Adhikari, Eun Seong Kim and Nam Young Kim \*

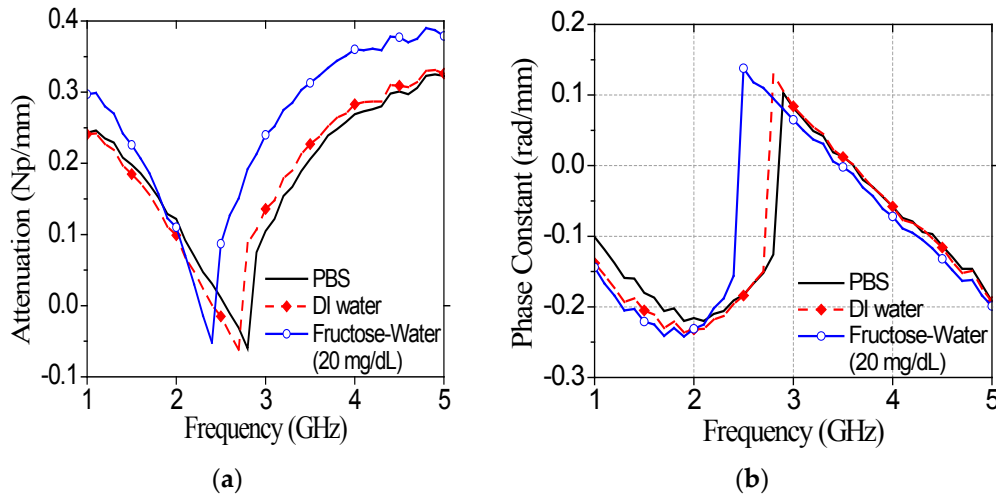

**Figure S1.** Microwave characterization of aqueous solutions using proposed microfabricated biochip. (a) Attenuation and (b) phase constant.

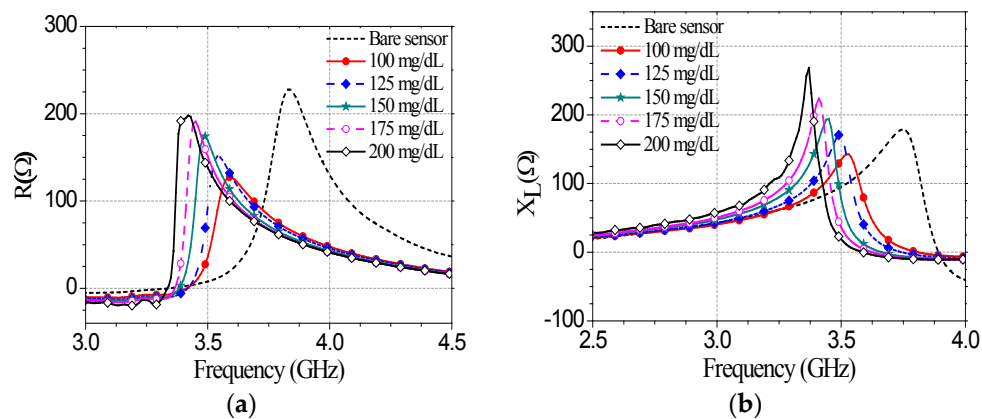

**Figure S2.** Glucose-level-dependent impedance constituent parameters of the proposed biochip for human serum. (a) Net resistance and (b) net inductive reactance.
